# Supplementary material
Source: PubMed Central journal article supplement (PMC5286943)

# Early treatment intensification with R-ICE and 90Y-ibritumomab tiuxetan (Zevalin)-BEAM stem cell transplantation in patients with high-risk diffuse large B-cell lymphoma patients and positive interim PET after 4 cycles of R-CHOP-14

Mark Hertzberg,<sup>1</sup> Maher K. Gandhi,<sup>2,3</sup> Judith Trotman,<sup>4</sup> Belinda Butcher,<sup>5</sup> John Taper,<sup>6</sup> Amanda Johnston,<sup>7</sup> Devinder Gill,<sup>3</sup> Shir-Jing Ho,<sup>8</sup> Gavin Cull,<sup>9</sup> Keith Fay,<sup>10</sup> Geoff Chong,<sup>11</sup> Andrew Grigg,<sup>12</sup> Ian D. Lewis,<sup>13</sup> Sam Milliken,<sup>14</sup> William Renwick,<sup>15</sup> Uwe Hahn,<sup>16</sup> Robin Filshie,<sup>17</sup> George Kannourakis,<sup>18</sup> Anne-Marie Watson,<sup>19</sup> Pauline Warburton,<sup>20</sup> Andrew Wirth,<sup>21</sup> John F. Seymour,<sup>22</sup> Michael S. Hofman<sup>23</sup> and Rodney J. Hicks;<sup>23</sup> on behalf of the Australasian Leukaemia Lymphoma Group (ALLG)

<sup>1</sup>Department of Haematology, Prince of Wales Hospital and University of NSW, Randwick, NSW; <sup>2</sup>The University of Queensland Diamantina Institute Woolloongabba, Brisbane, QLD and <sup>3</sup>Department of Haematology, Princess Alexandra Hospital Brisbane, QLD; <sup>4</sup>Department of Haematology, Repatriation General Hospital Concord and University of Sydney, NSW; <sup>5</sup>WriteSource Medical Pty Ltd., Lane Cove, NSW; <sup>6</sup>Nepean Cancer Care Centre, Nepean Hospital Nepean, NSW; <sup>7</sup>Department of Haematology, Westmead Hospital, NSW; <sup>8</sup>Department of Haematology, St George Hospital Kogarah, NSW; <sup>9</sup>Department of Haematology, Sir Charles Gairdner Hospital Perth, WA; <sup>10</sup>Department of Haematology, Royal North Shore Hospital, St Leonard's, NSW; <sup>11</sup>Olivia Newton John Cancer & Wellness Centre, Austin Hospital, Heidelberg, VIC; <sup>12</sup>Department of Haematology, Austin Hospital, Heidelberg, VIC; <sup>13</sup>Department of Haematology, Royal Adelaide Hospital Adelaide, SA; <sup>14</sup>Department of Haematology, St Vincent's Hospital Darlinghurst, NSW; <sup>15</sup>Department of Haematology, Royal Melbourne Hospital Parkville, VIC; <sup>16</sup>Department of Haematology, The Queen Elizabeth Hospital, SA; <sup>17</sup>Department of Haematology, St Vincent's Hospital Melbourne, VIC; <sup>18</sup>Ballarat Oncology and Haematology Service and Fiona Elsey Cancer Research Institute, Ballarat, VIC; <sup>19</sup>Department of Haematology, Liverpool Hospital, Liverpool, NSW; <sup>20</sup>Department of Haematology, Wollongong Hospital, Wollongong, NSW; <sup>21</sup>Department of Radiation Oncology, Peter MacCallum Cancer Centre East Melbourne, VIC; <sup>22</sup>Department of Haematology, Peter MacCallum Cancer Centre East Melbourne and University of Melbourne, Parkville, VIC and <sup>23</sup>Department of Cancer Imaging, Peter MacCallum Cancer Centre East Melbourne, VIC, Australia

©2017 Ferrata Storti Foundation. This is an open-access paper. doi:10.3324/haematol.2016.154039

Received: August 11, 2016.

Accepted: November 3, 2016.

Pre-published: November 10, 2016.

Correspondence: mhertzberg10@gmail.com

## **Supplemental Text**

### ***R-CHOP-14 Regimen***

The R-CHOP-14 regimen consisted of rituximab 375 mg/m<sup>2</sup>, cyclophosphamide 750 mg/m<sup>2</sup>, doxorubicin 50 mg/m<sup>2</sup>, vincristine 1.4 mg/m<sup>2</sup>, and prednisone 100 mg for 5 days) with pegfilgrastim 6 mg sc day 4.

### ***R-ICE Regimen***

The R-ICE salvage regimen consisted of rituximab 375mg/m<sup>2</sup>, ifosfamide 5 000 mg/m<sup>2</sup>, carboplatin AUC = 5 [maximum 800 mg], etoposide 100 mg/m<sup>2</sup> daily for 3 days and pegfilgrastim 6mg sc day 5.

### ***Labelling of Ibritumomab tiuxetan with <sup>90</sup>Yttrium (Zevalin)***

At a central site Ibritumomab tiuxetan was labelled to <sup>90</sup>Yttrium as part of the Z-BEAM regimen as previously published<sup>25</sup>. Ibritumomab tiuxetan was provided as part of the radio-labelling kit (Zevalin) in the form of a 3 ml glass vial containing 2 ml (3.2 mg) of antibody at a concentration of 1.6 mg/ml in low metal normal saline. <sup>90</sup>Yttrium was shipped weekly from France, labelled to antibody in Sydney, and then dispatched to the treating site for patient administration within 2 days. An unlabelled pre-dose of rituximab (250 mg/m<sup>2</sup>) was infused 1-4 hours prior to the Zevalin in order to clear the blood of B cells and further enable targeting of the radiolabelled isotope to the tumor cells. Zevalin was administered as an intravenous infusion over 10 minutes at a dose of 14.8 MBq (0.4 mCi) <sup>90</sup>Y/kg or a maximum dose of 1,184 MBq (32 mCi) on day -14 followed by BEAM (BCNU 300 mg/m<sup>2</sup> d-6, Etoposide 100 mg/m<sup>2</sup> q12 hours d-5 to d-2, cytarabine 200 mg/m<sup>2</sup> q12 hours d-5 to d-2, melphalan 140 mg/m<sup>2</sup> d-1) and PBSC infusion.

# Supplemental Figures 1A and 1B

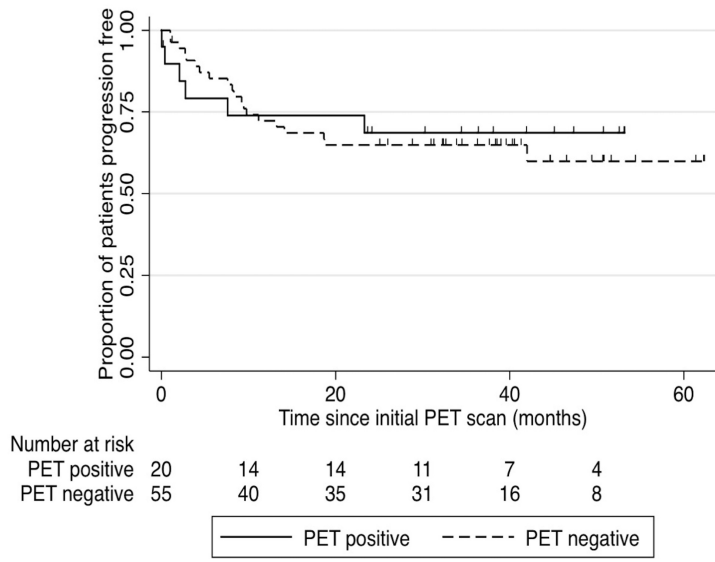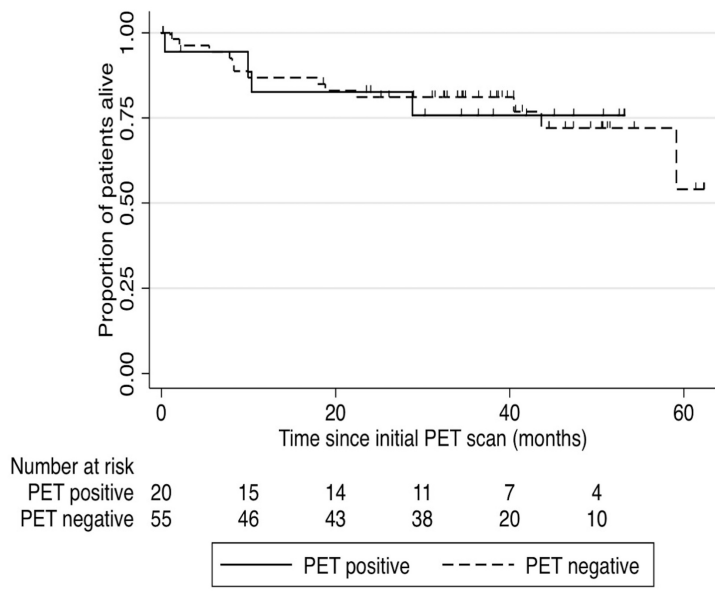

Supplement: 2016.154039.HERTBERG_SUPPL.pdf [file 2016.154039.HERTBERG_SUPPL.pdf]
